# Supplementary material for: Enhanced luminescence of Ni3S4:Co nanoparticles with fast nanosecond lifetimes
Source: Royal Society of Chemistry journal article supplement (doi:10.1039/d4nj02724h), 2024-01-01
Supplement: d4nj02724h1.pdf [file d4nj02724h1.pdf]

## Supporting Information

### Enhanced luminescence of $\text{Ni}_3\text{S}_4\text{:Co}$ nanoparticles with fast nanosecond lifetime

Jidan Xing<sup>a,b</sup>, Zhipeng Liu<sup>a,b</sup>, Pingping Ou<sup>b</sup>, Mingyan Chuai<sup>b,c\*</sup>, Guoliang Chai<sup>b,c\*</sup>

<sup>a</sup>*Fuzhou University, College of Chemistry, Fuzhou 350108, Fujian, People's Republic of China*

<sup>b</sup>*State Key Laboratory of Structural Chemistry, Fujian Institute of Research on the Structure of Matter, Chinese Academy of Sciences, Fuzhou 350002, Fujian, People's Republic of China*

<sup>c</sup>*Minduo Innovation Laboratory, Fujian Science & Technology Innovation Laboratory for Optoelectronic Information of China, Fuzhou 350108, Fujian, People's Republic of China*

\*Corresponding Authors' E-mail: g.chai@fjirsm.ac.cn; chuaimingyan@fjirsm.ac.cn

## Experiment section

### Materials characterization

The valence states of the elements were analyzed by using X-ray photoelectron spectroscopy (XPS, ESCALAB MK II). The luminescence decay profile measurements were carried out with an Edinburgh FLS980 fluorescence spectrophotometer using a picosecond pulsed LASER Diode EPL as the source of excitation.

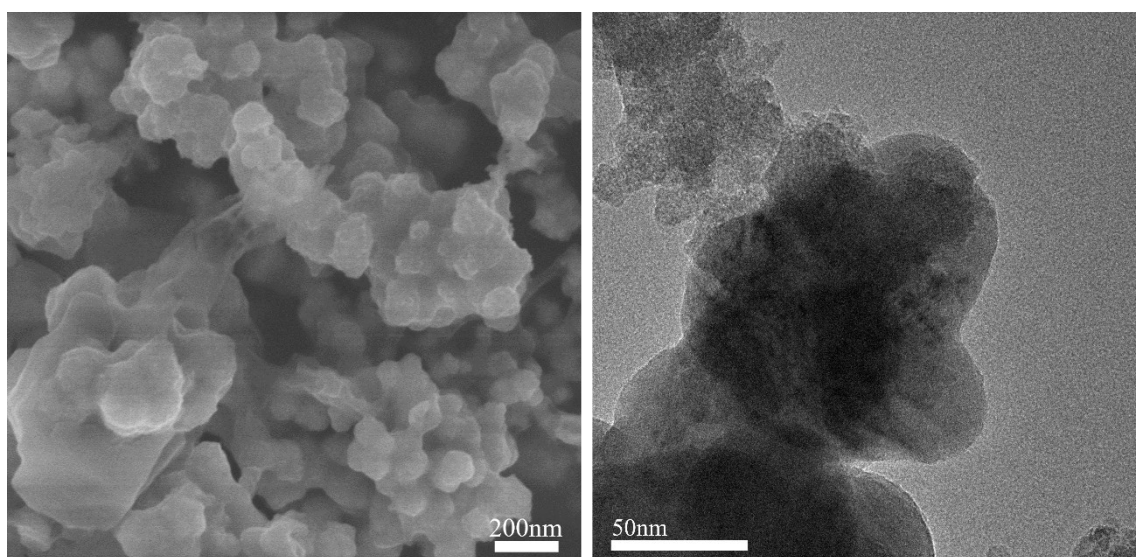

**Fig. S1.** The high magnification SEM and TEM image of pure  $\text{Ni}_3\text{S}_4$ .

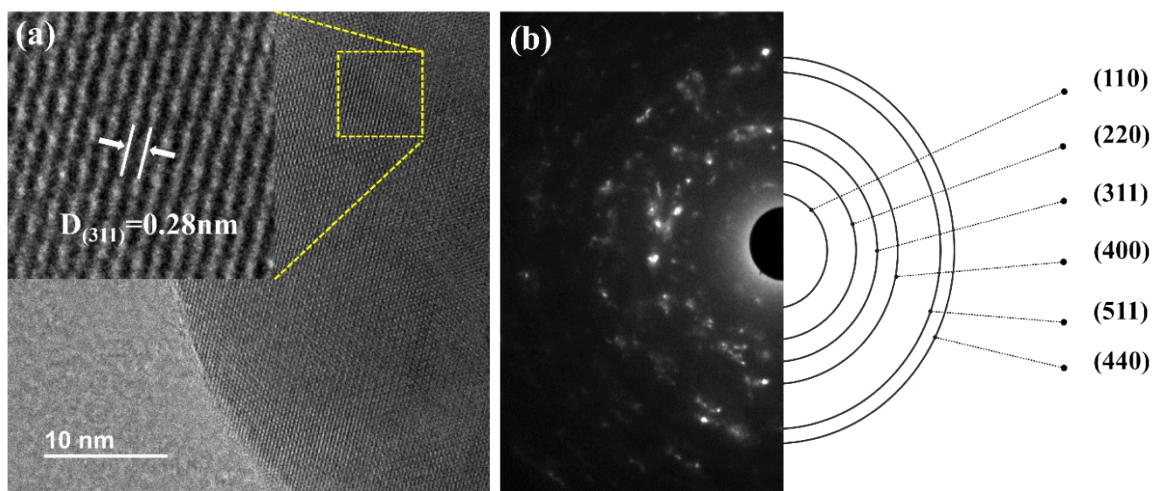

**Fig. S2.** The HRTEM (a) pattern and SAED (b) images of pure  $\text{Ni}_3\text{S}_4$ .

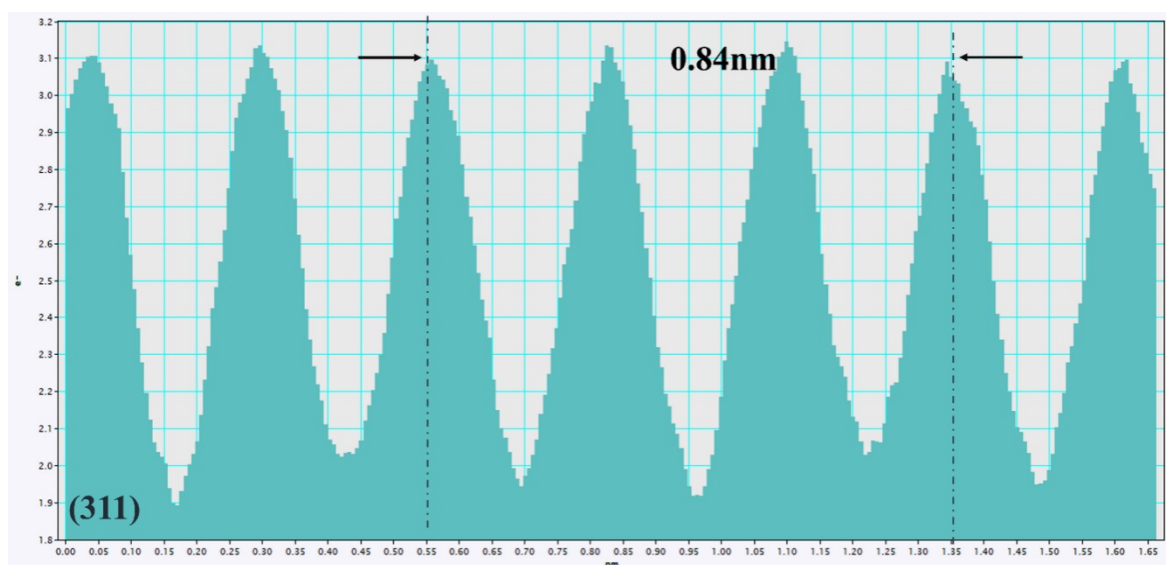

**Fig. S3.** FFT patterns of the area and normalized intensity variations of  $\text{Ni}_3\text{S}_4:\text{Co}$  (0.51 at.%).

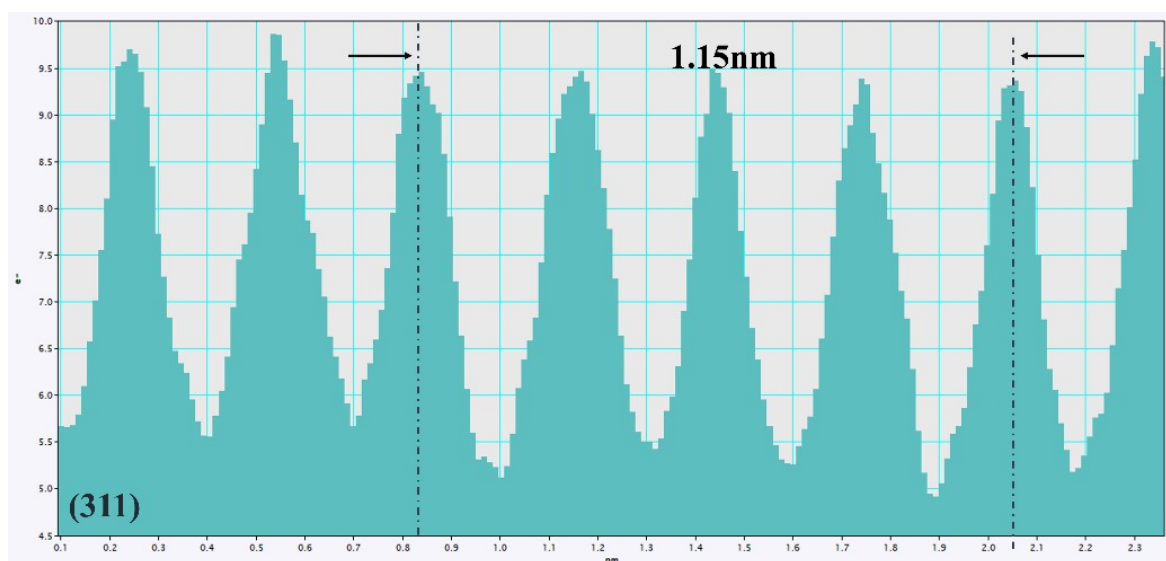

**Fig. S4.** FFT patterns of the area and normalized intensity variations of pure  $\text{Ni}_3\text{S}_4$ .

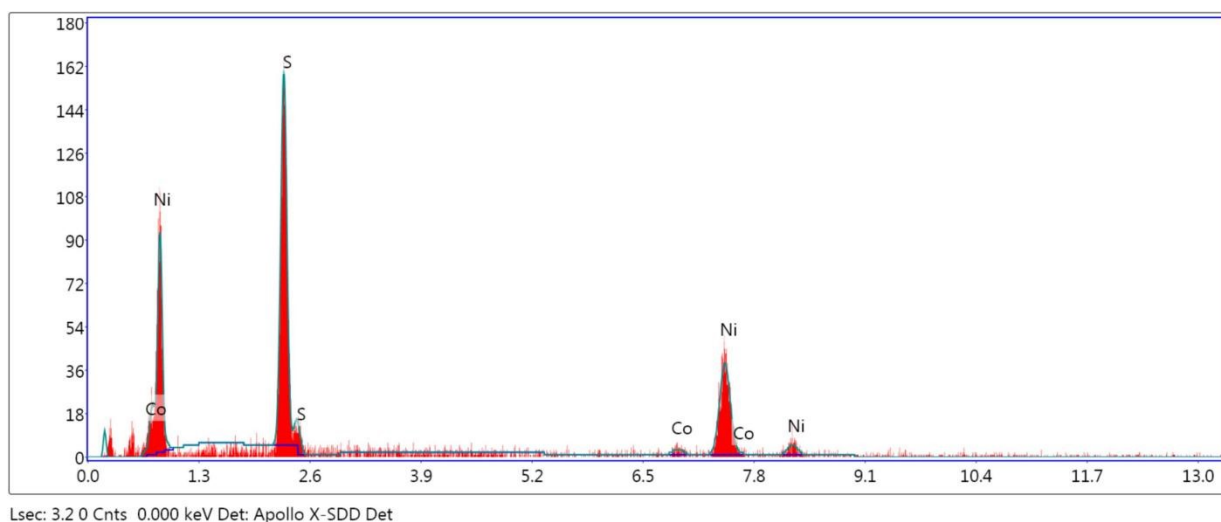

**Fig. S5.** TEM-EDS results of  $\text{Ni}_3\text{S}_4\text{:Co}$  (0.51 at.%).

**Table S1.** The atomic percentage of each element for  $\text{Ni}_3\text{S}_4\text{:Co}$  (0.51 at.%).

| Element | Line Type | Atomic Percentage | Standard Sample Lable |
|---------|-----------|-------------------|-----------------------|
| S       | K         | 57.14             | FeS                   |
| Ni      | K         | 42.35             | Ni                    |
| Co      | K         | 0.51              | Co                    |
| Total   |           | 100               |                       |

The peaks of Co, Ni and S can be clearly observed in the energy dispersive spectrometer (EDS) pattern as shown in **Fig. S5**. The atomic percentages of S and Ni are 57.14%, and 42.35% respectively (shown in **Table S1**).

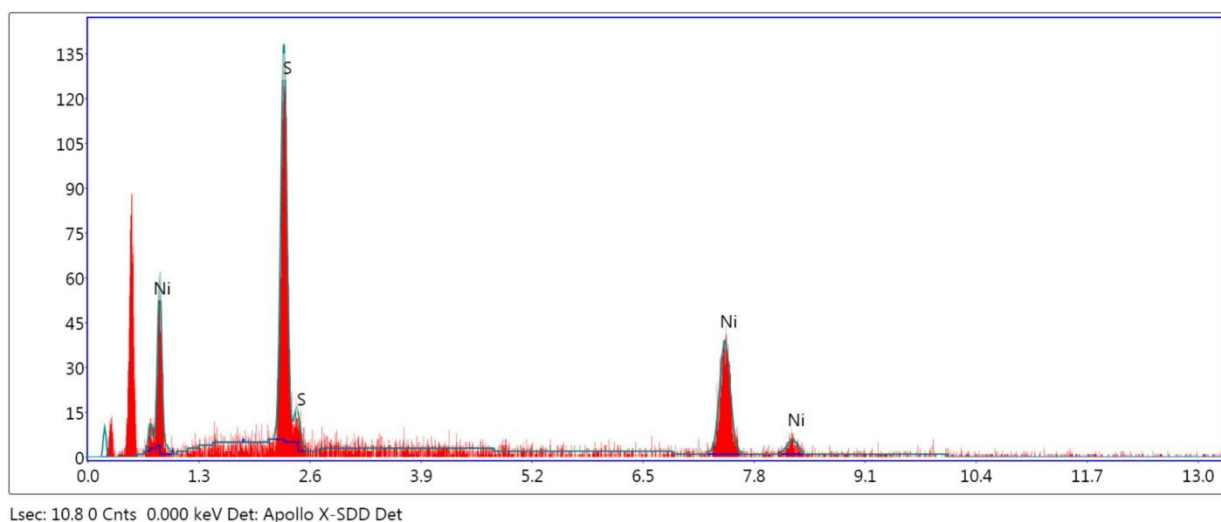

**Fig. S6.** TEM-EDS results of  $\text{Ni}_3\text{S}_4\text{:Co}$  (0.51 at.%).

**Table S2.** The atomic percentage of each element for pure  $\text{Ni}_3\text{S}_4$ .

| Element | Line Type | Atomic Percentage | Standard Sample Lable |
|---------|-----------|-------------------|-----------------------|
| S       | K         | 55.16             | FeS                   |
| Ni      | K         | 44.84             | Ni                    |
| Total   |           | 100               |                       |

The peaks of Ni and S can be clearly observed in the energy dispersive spectrometer (EDS) pattern as shown in Fig. S6. The atomic percentages of S and Ni are 55.16%, and 44.84% respectively (shown in Table S2).

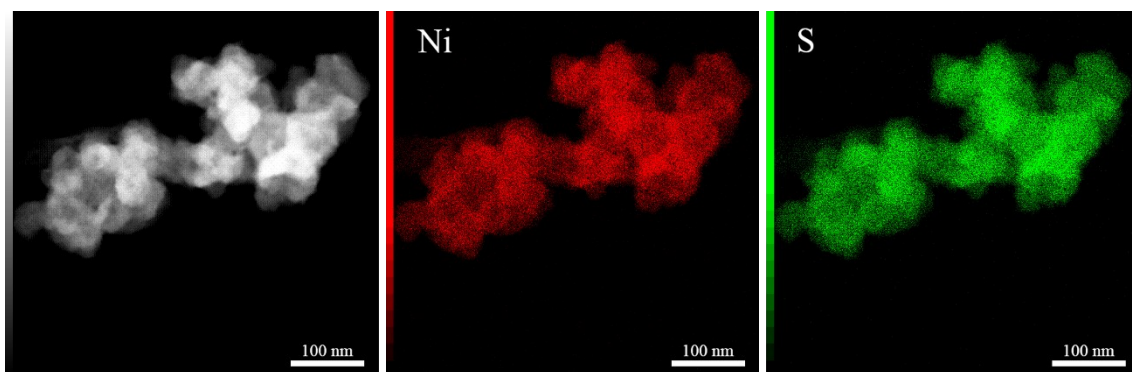

**Fig. S7.** Elemental mapping images of Co and S respectively of pure  $\text{Ni}_3\text{S}_4$ .
